# Supplementary material for: Detection of human epidermal growth factor receptor 2 overexpression in canine anal sac gland carcinoma
Source: PubMed Central journal article supplement — J Vet Med Sci. 2019 May 29;81(7):1034–9. doi: 10.1292/jvms.19-0019 (PMC6656818; doi:10.1292/jvms.19-0019), 2019-05-29

Table S1. HER2<sup>a)</sup> scoring methods proposed by ASCO/CAP<sup>b)</sup>

| Score | Description                                                                                                                                                                                                      |
|-------|------------------------------------------------------------------------------------------------------------------------------------------------------------------------------------------------------------------|
| 3+    | Circumferential membrane staining that is complete, intense,<br>and<br>in >10% of tumor cells                                                                                                                    |
| 2+    | Circumferential membrane staining that is incomplete and/or<br>weak/moderate and in >10% of tumor cells<br>or<br>Complete and circumferential membrane staining that is<br>intense and<br>in <10% of tumor cells |
| 1+    | Incomplete membrane staining that is faint/barely perceptible<br>and<br>in >10% of tumor cells                                                                                                                   |
| 0     | No staining is observed<br>or<br>Membrane staining that is incomplete and is faint/barely<br>perceptible and<br>in <10% of tumor cells.                                                                          |

a) HER2: Human epidermal growth factor receptor 2

b) ASCO/CAP: American Society of Clinical Oncology/College of American Pathologists

Fig. S1. Human epidermal growth factor receptor 2 (HER2) scoring of canine anal sac gland carcinoma (ASGC) based on American Society of Clinical Oncology/College of American Pathologists. (A, B, C) Representative images of the staining pattern of HER2 in canine ASGC. Scale bar, 100  $\mu$ m. (D, E, F) Higher magnification of the representative images. Scale bar, 50 $\mu$ m.

Fig. S1.

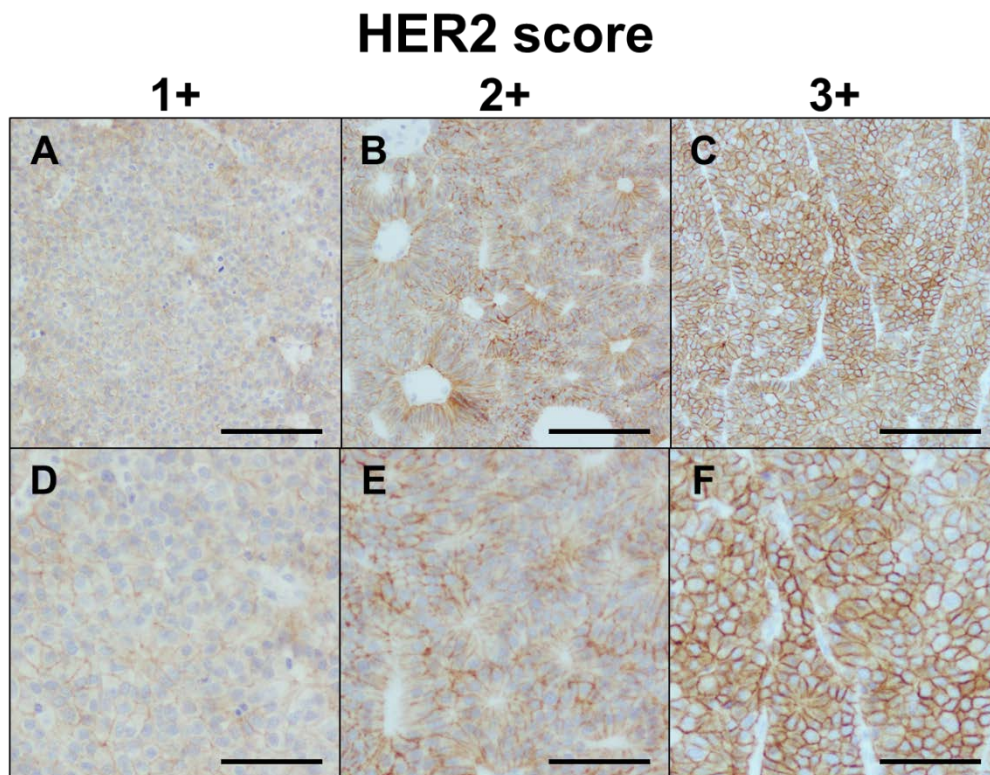

Fig. S2. Human epidermal growth factor receptor 2 (HER2) expression in canine normal anal tissues. (A) Representative images of the staining pattern of HER2 in canine normal anal sac tissues. Scale bar, 200  $\mu\text{m}$ . (B, C) Higher magnification of the apocrine glands (B) and squamous epithelia (C). Scale bar, 100  $\mu\text{m}$ .

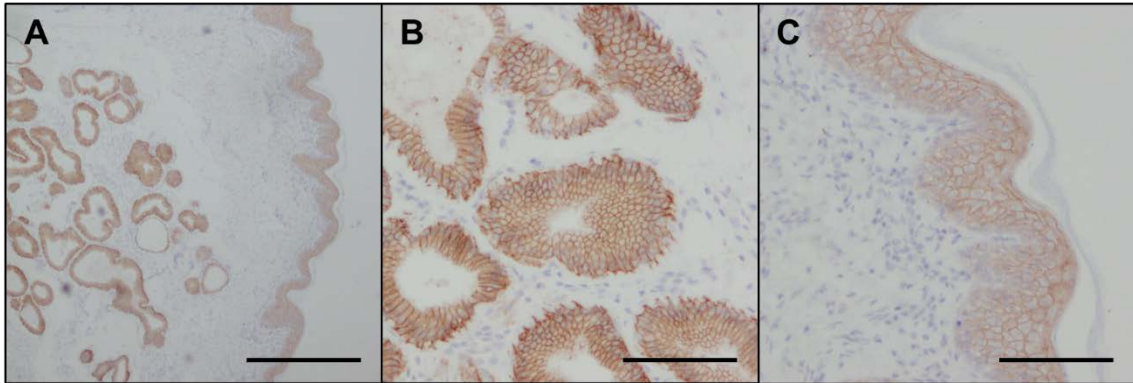

Supplement: jvms-81-1034-s001.pdf [file jvms-81-1034-s001.pdf]
